# Supplementary material for: A guide to systems-level, participatory, theory-informed implementation research in global health
Source: HighWire-hosted journal article supplement (doi:10.1136/bmjgh-2021-005365), 2021-12-01
Supplement: bmjgh-2021-005365supp001_data_supplement.pdf [file bmjgh-2021-005365supp001_data_supplement.pdf]

## Supplementary material A: Examples of how implementation science theories and the realist evaluation are applied in practice

Below we describe how different methodologies have been applied in practice.

### Implementation science methods

#### *Implementation science theory*

An example of an implementation theory is the Normalization Process Theory (NPT) that identifies four determinants required to embed a complex interventions into practice.<sup>(1)</sup> The determinants of the NPT include coherence, cognitive participation or engagement, collective action, and reflective monitoring. An example of using NPT in global health research is a feasibility study of community level interventions for pre-eclampsia in South Asia and sub-Saharan Africa.<sup>(2)</sup> The aim of the study was to understand barriers and enablers to implement an intervention to detect and treat pre-eclampsia using lay health workers within the existing health system. The NPT was used to explore enablers and barriers for the implementation of this intervention into everyday practice. E-Table 1 describes how this feasibility trial monitored the determinants of the NPT

**Table 1 Application of the NPT to a feasibility trial for the implementation of interventions for pre-eclampsia in South Asia and sub-Saharan Africa (2)**

| Normalisation Process Theory determinant                                                                             | How it was applied in the trial                                                                                                                                                                                                                            |
|----------------------------------------------------------------------------------------------------------------------|------------------------------------------------------------------------------------------------------------------------------------------------------------------------------------------------------------------------------------------------------------|
| Coherence – aspects of the intervention that are similar to existing practice                                        | Review of the health workers curriculum, practice guidelines and policies.                                                                                                                                                                                 |
| Cognitive participation - understanding the dynamics of intervention and potential benefits/harms from participation | Providing the opportunity to discuss the importance and potential benefit/risk with wide range of stakeholders.                                                                                                                                            |
| Collective action – collaboration between individuals and groups responsible to implement the intervention.          | The implementation of this intervention was dependent on the collective action of all stakeholders. This was evaluated through discussion of participatory activities such as community engagement, capacity building and on-going support.                |
| Reflexive monitoring – reflecting on enabling and impeding factors that could potentially normalize the intervention | Researchers provide feedback during data collection to assess the level of community and stakeholder support.<br>Facilitators lead focus group discussions to explore the collective experiences of community members, health providers and policy makers. |

### Realist evaluation

An example of applying realist theory to implementation research is a study that evaluated how different contexts influenced the mechanisms responsible for divergent outcomes for the implementation of a user fee exemption policy for caesarean section at two hospitals in Benin.<sup>(3)</sup> Table E-2 describes the findings from this study.

**Table E-2 Example of a realist evaluation to explain divergent outcomes in two different contexts<sup>(3)</sup>**

| Context-mechanisms and outcomes | Faith based hospital                                                                                                                                                                                                                                                                                        | State owned hospital                                                                                                                                                                                                                                                                          |
|---------------------------------|-------------------------------------------------------------------------------------------------------------------------------------------------------------------------------------------------------------------------------------------------------------------------------------------------------------|-----------------------------------------------------------------------------------------------------------------------------------------------------------------------------------------------------------------------------------------------------------------------------------------------|
| Context                         | <p>Non-state-owned hospital; urban area with a monetary poverty index at 25%; limited public financial contribution to the recurrent costs.</p> <p>Inadequate organization and supervision support; 'laissez-faire' attitude about the programme.</p>                                                       | <p>State-owned hospital in a semi-rural area with a monetary poverty index at 46%; receive public funds to cover recurrent costs from multiple mechanisms.</p> <p>Strong perceived hierarchical pressure within the hospital.</p>                                                             |
| Mechanism                       | <p>Mistrust in the state; poor intrinsic adherence to the goals and values of the policy, fear of financial loss for the facility; weak perceived pressure to adopt the programme.</p> <p>Low adherence to the policy goals and values, poor perceived pressure to implement the appropriate practices.</p> | <p>Strong perceived top-down and bottom-up pressure to adopt the programme; fear of administrative and community penalties if not adopting the programme; adherence to the policy goals and values.</p> <p>Fear of administrative and community penalties if not implementing the policy.</p> |

### References

1. Murray E, Treweek S, Pope C, et al. Normalisation process theory: a framework for developing, evaluating and implementing complex interventions. *BMC Med.* 2010;8:63.
2. Khowaja AR, Qureshi RN, Sawchuck D, et al. The feasibility of community level interventions for pre-eclampsia in South Asia and Sub-Saharan Africa: a mixed-methods design. *Reprod Health.* 2016;13 Suppl 1(Suppl 1):56.
3. Dossou JP, De Brouwere V, Van Belle S, et al. Opening the 'implementation black-box' of the user fee exemption policy for caesarean section in Benin: a realist evaluation. *Health Policy and Planning.* 2019;35(2):153-66.
